# Supplementary material for: A human in vitro model system for investigating genome-wide host responses to SARS coronavirus infection
Source: PubMed Central journal article supplement (PMC518965; doi:10.1186/1471-2334-4-34), 2004-09-09

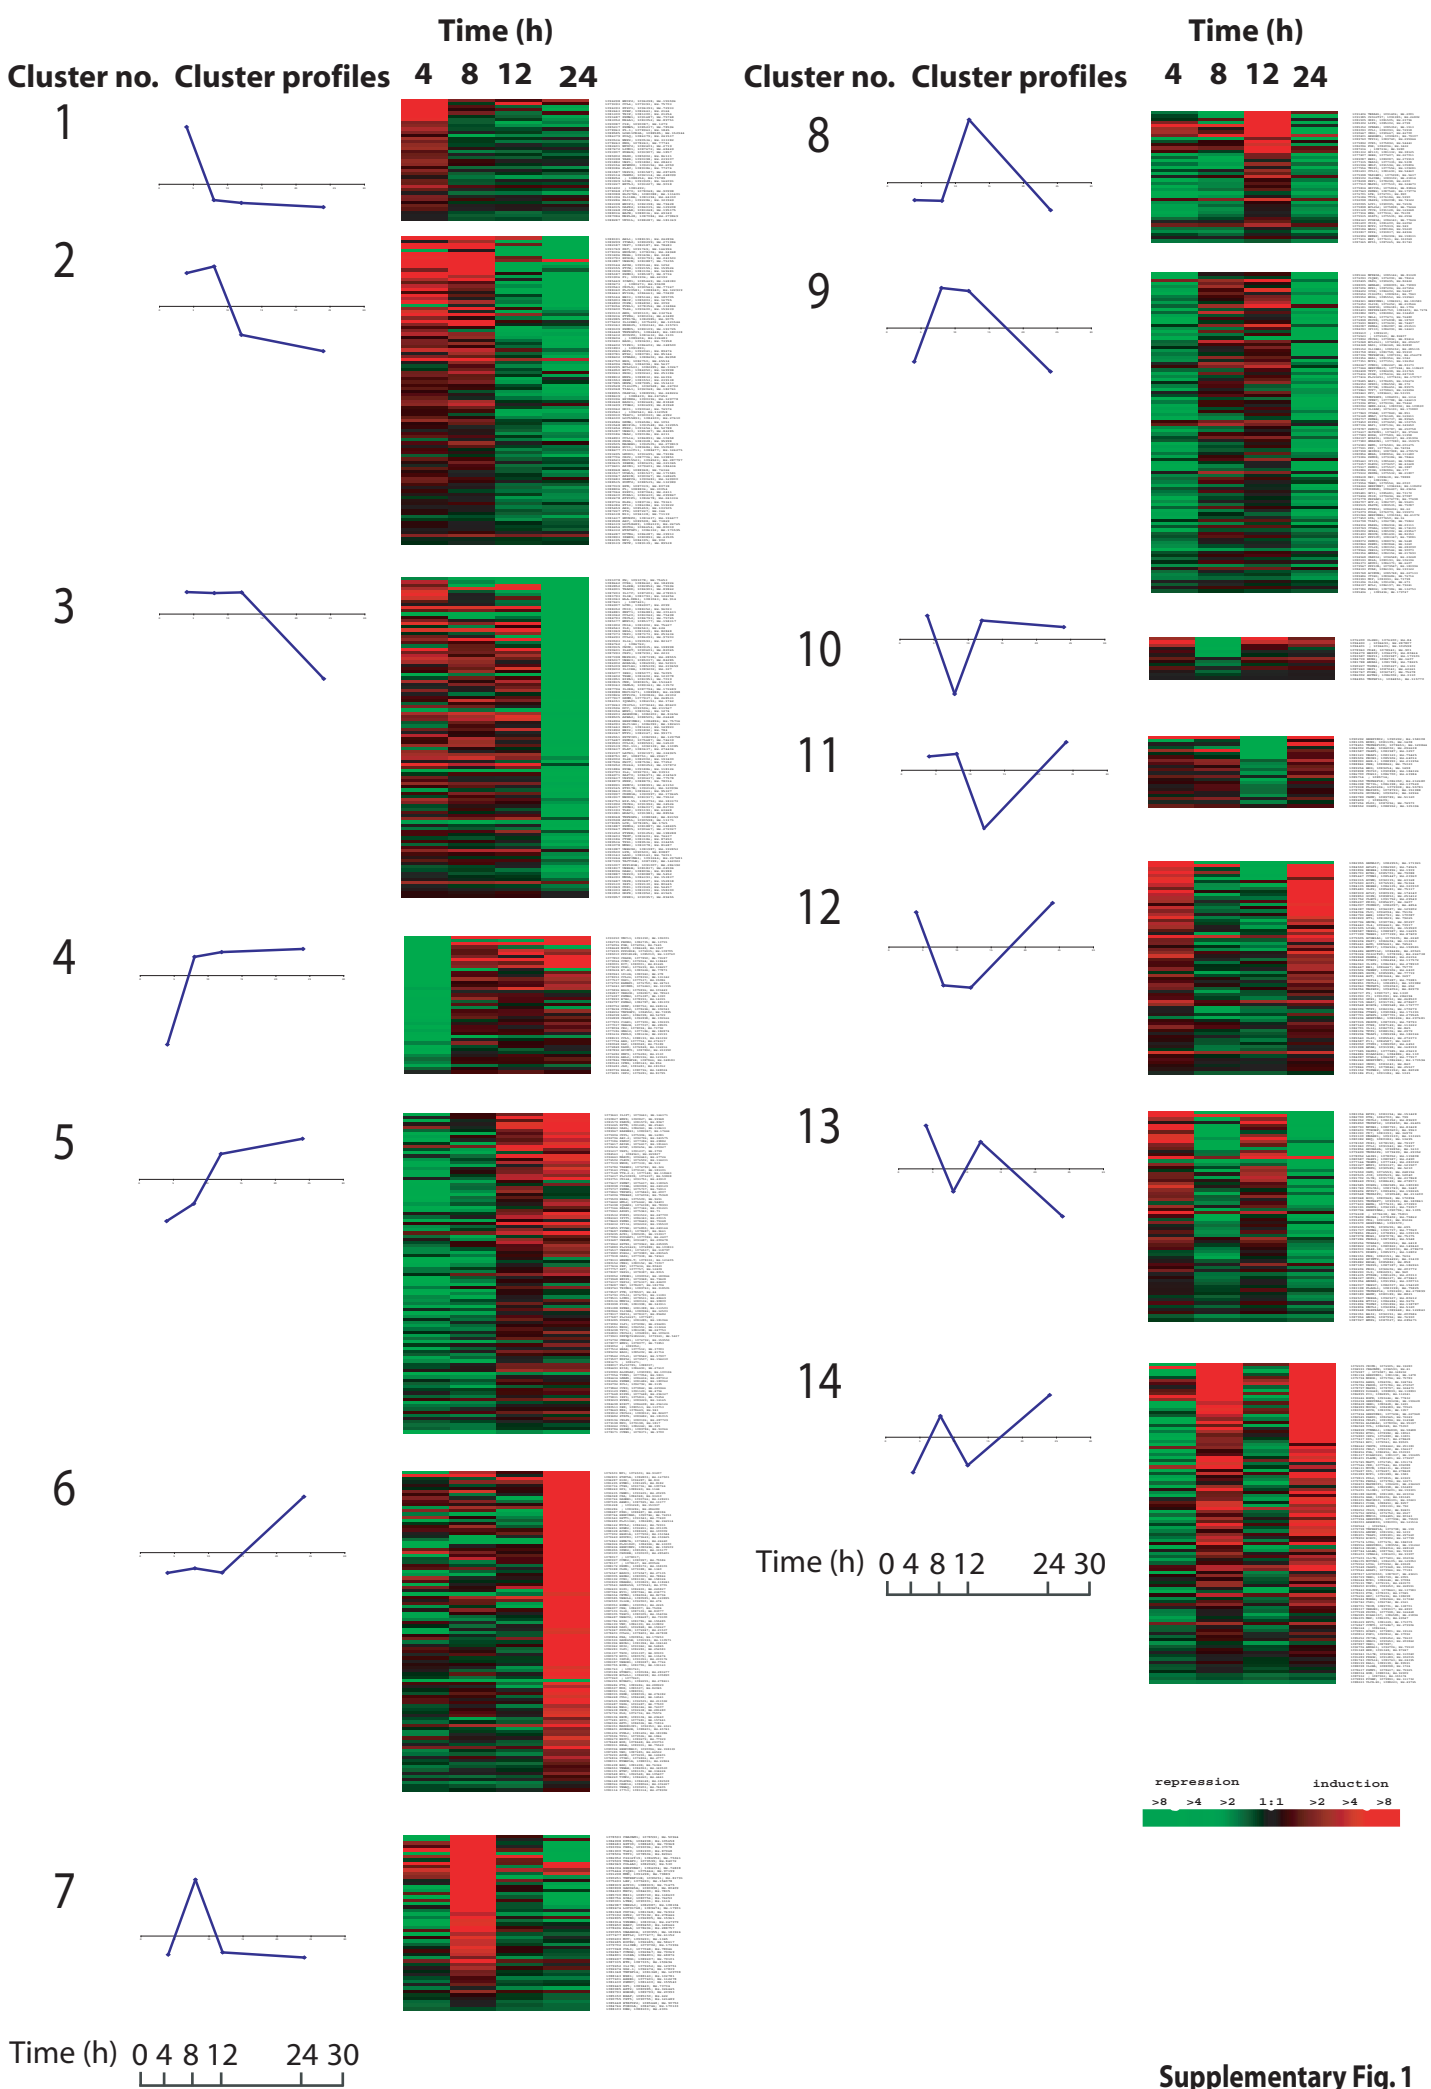

Supplement: 1471-2334-4-34-S1.pdf [file 1471-2334-4-34-S1.pdf]
